# Supplementary material for: Fabrication of Polyamide-6 Membranes—The Effect of Gelation Time towards Their Morphological, Physical and Transport Properties
Source: MDPI journal article supplement (doi:10.3390/membranes12030315), 2022-03-10
Supplement: s1 [file s1]

Supplementary Material

# Fabrication of Polyamide-6 Membranes—The Effect of Gelation Time towards Their Morphological, Physical, and Transport Properties

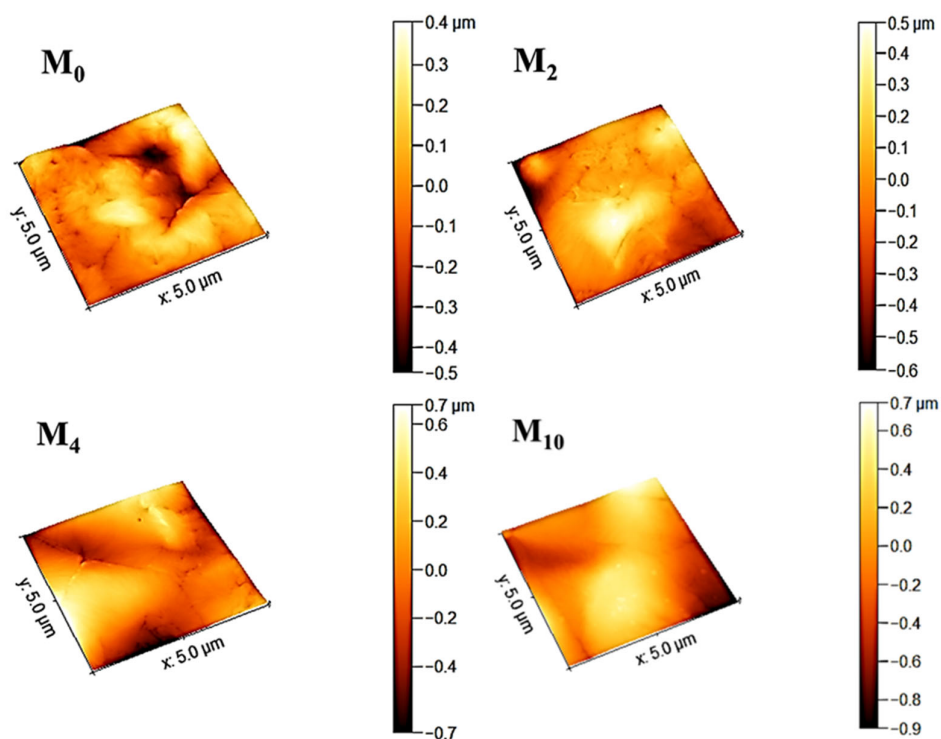

**Figure S1.** Surface morphology of PA6 membranes with different gelation time for 5  $\mu\text{m}$   $\times$  5  $\mu\text{m}$  scanned area.

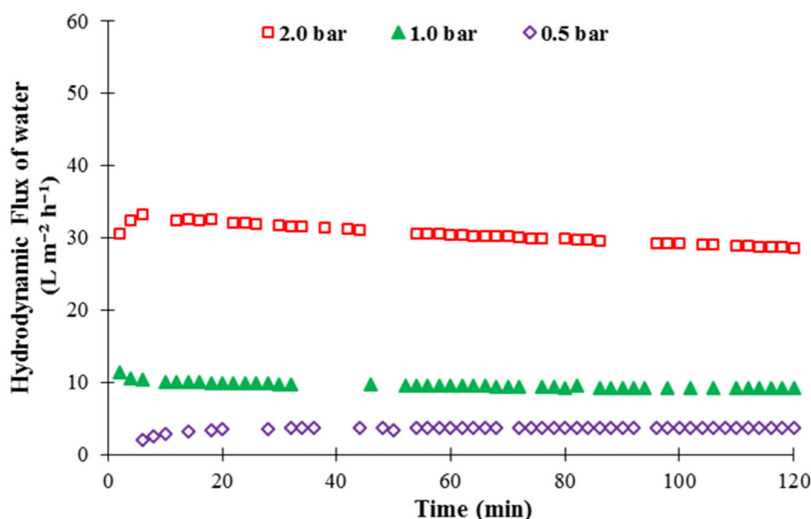

**Figure S2.** Hydrodynamic water flux of  $M_0$  membrane (gelation time 0 min) at three operating pressures.

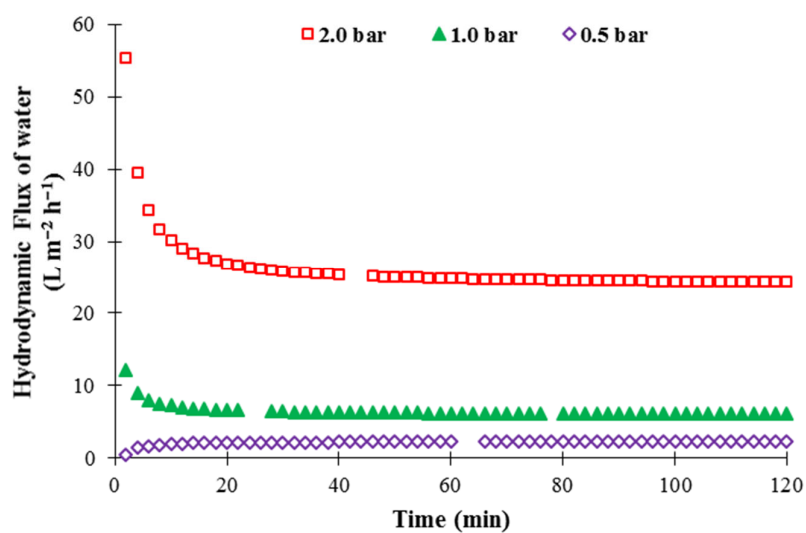

**Figure S3.** Hydrodynamic water flux of M2 membrane (gelation time 2 min) at three operating pressures.

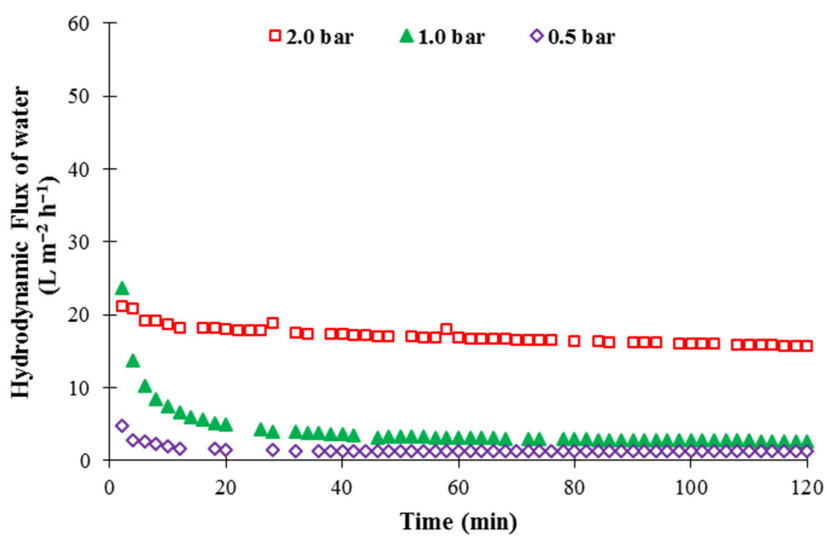

**Figure S4.** Hydrodynamic water flux of M4 membrane (gelation time 4 min) at three operation pressures.

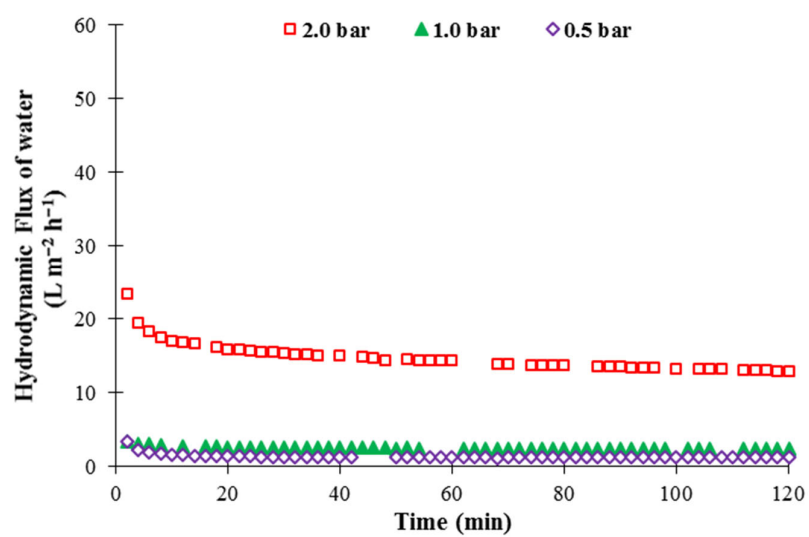

**Figure S5.** Hydrodynamic water flux of M<sub>10</sub> membrane (gelation time 10 min) at three operating pressures.
